# Supplementary material for: Flares of acute graft-versus-host disease: a Mount Sinai Acute GVHD International Consortium analysis
Source: PubMed Central journal article supplement — Blood Adv. 2024 Feb 8;8(8):2047–57. doi: 10.1182/bloodadvances.2023012091 (PMC11103178; doi:10.1182/bloodadvances.2023012091), 2024-02-08
Supplement: BLOODA_ADV-2023-012091-mmc1.pdf [file BLOODA_ADV-2023-012091-mmc1.pdf]

# Supplemental Appendix

|                                                                                                                                  |    |
|----------------------------------------------------------------------------------------------------------------------------------|----|
| <b>Supplement methods</b> .....                                                                                                  | 2  |
| <b>Table S1. Patient distribution by center</b> .....                                                                            | 3  |
| <b>Table S2. Correlation coefficients between covariates</b> .....                                                               | 4  |
| <b>Table S3. Patient characteristics with and without flares</b> .....                                                           | 5  |
| <b>Table S4. Multivariate analysis for NRM within 6 months after CR/VGPR treating flares as a time-dependent covariate</b> ..... | 7  |
| <b>Table S5. GVHD characteristics at 1st onset and at flare</b> .....                                                            | 8  |
| <b>Table S6. Cumulative incidence of GVHD flares within 6 months from CR/VGPR stratified by baseline characteristics</b> .....   | 9  |
| <b>Table S7. Effect modifications of steroid taper rates by the AA scores on the risk of flares</b> .....                        | 11 |
| <b>Table S8. Flare rates within 6 months stratified by three risk factors</b> .....                                              | 12 |
| <b>Figure S1. Associations of treatment response on flares and NRM</b> .....                                                     | 13 |
| <b>Figure S2. Association of steroid taper rates on flares</b> .....                                                             | 14 |
| <b>Figure S3. Association of biomarkers at the time of flares on NRM</b> .....                                                   | 15 |

## Supplement methods

### Weekly steroid taper rate

We calculated the weekly steroid taper rate to assess the potential impact of the kinetics of steroid reduction on the risk of flares. We considered CR/VGPR as the starting point (denoted as  $X_{start}$ ). We used the daily steroid dose calculated at the first occurring event as the ending point: a) day 28 after CR/VGPR, b) steroid discontinuation, c) death, d) the time of flares (denoted as  $X_{end}$ ). The duration between  $X_{start}$  and  $X_{end}$  was represented as  $Y_{duration}$ . The weekly steroid reduction rate was calculated as below.

$$\text{Weekly steroid reduction rate (\%)} = \frac{X_{start} - X_{end}}{Y_{duration}} * 7 * \frac{1}{X_{start}} * 100$$

### Separating rapid and slow steroid tapers

We divided the patients into four groups from least reduction to greatest reduction in steroid dose per week, that roughly corresponded to quartiles: Group 1 (<15%), Group 2 ( $\geq 15\%$ , and <20%), Group 3 ( $\geq 20\%$ , and <30%), and Group 4 ( $\geq 30\%$ ). There were no high correlation coefficients ( $> 0.2$ ) between steroid tapering group and baseline characteristics (Table S2). The cumulative incidence of flares at 6 months from CR/VGPR steadily increased from 14% to 33% as the pace of steroid taper increased (Figure S2A). Because there was an interaction between steroid taper rate and the maximum steroid dose before CR/VGPR on GVHD flares (Figure S2B and S2C), we divided patients into slow and rapid taper groups that accounted for the maximum steroid dose before CR/VGPR. Slow tapers included patients who were tapered <20%/week if the maximum steroid dose was  $\leq 1$  mg/kg or <30%/week if the maximum steroid dose was >1mg/kg. All other patients were included in the rapid taper group.

**Table S1. Patient distribution by center**

|                                                   | n=968 |
|---------------------------------------------------|-------|
| University of Regensburg                          | 172   |
| University of Hamburg                             | 129   |
| Ohio State University                             | 106   |
| University of Erlangen                            | 85    |
| Mayo Clinic, Rochester                            | 79    |
| Icahn School of Medicine at Mount Sinai, New York | 68    |
| Massachusetts General Hospital, Boston            | 64    |
| Children's Hospital of Atlanta                    | 40    |
| City of Hope Comprehensive Cancer Center, Duarte  | 35    |
| University of Pennsylvania                        | 30    |
| University of Michigan                            | 29    |
| Vanderbilt University, Nashville                  | 23    |
| University of Würzburg                            | 22    |
| Columbia University, New York                     | 17    |
| King Chulalongkorn Memorial Hospital, Bangkok     | 14    |
| Bambino Gesù Childrens Hospital, Rome             | 10    |
| Childrens Hospital of Los Angeles                 | 9     |
| Hospital for Sick Children, Toronto               | 9     |
| Goethe University Frankfurt                       | 8     |
| University Hospital Carl Gustav Carus Dresden     | 8     |
| Freiburg University Medical Center                | 5     |
| Children's Hospital of Philadelphia               | 4     |
| Hannover Medical School                           | 2     |

**Table S2. Correlation coefficients between covariates**

|                                 | Recipient age | Sex mismatch | Donor type | GVHD prophylaxis | HCT-CI | Use of ATG or alemtuzumab | Conditioning | Max GVHD grades before CR/VGPR | Timing of CR/VGPR | Max steroid dose before CR/VGPR | GVHD treatment before CR/VGPR | Treatment response | Steroid taper rates* | Steroid taper rates** | Correlation coefficients |
|---------------------------------|---------------|--------------|------------|------------------|--------|---------------------------|--------------|--------------------------------|-------------------|---------------------------------|-------------------------------|--------------------|----------------------|-----------------------|--------------------------|
| AA at CR/VGPR                   | 0.096         | 0.017        | 0.088      | 0.066            | 0.061  | 0.089                     | 0.057        | 0.189                          | 0.046             | 0.233                           | 0.111                         | 0.063              | 0.013                | 0.100                 |                          |
| Recipient age                   |               | 0.102        | 0.219      | 0.070            | 0.193  | 0.088                     | 0.308        | 0.070                          | 0.039             | 0.199                           | 0.045                         | 0.035              | 0.114                | 0.126                 | > 0.3                    |
| Sex mismatch                    |               |              | 0.225      | 0.063            | 0.102  | 0.038                     | 0.067        | 0.003                          | 0.021             | 0.030                           | 0.053                         | 0.011              | 0.006                | 0.040                 | > 0.5                    |
| Donor type                      |               |              |            | 0.521            | 0.219  | 0.394                     | 0.136        | 0.081                          | 0.042             | 0.087                           | 0.056                         | 0.084              | 0.110                | 0.114                 |                          |
| GVHD prophylaxis                |               |              |            |                  | 0.07   | 0.378                     | 0.093        | 0.121                          | 0.048             | 0.057                           | 0.061                         | 0.039              | 0.077                | 0.074                 |                          |
| HCT-CI                          |               |              |            |                  |        | 0.073                     | 0.091        | 0.058                          | 0.005             | 0.017                           | 0.044                         | 0.065              | 0.054                | 0.080                 |                          |
| Use of ATG or alemtuzumab       |               |              |            |                  |        |                           | 0.112        | 0.065                          | 0.086             | 0.051                           | 0.065                         | 0.057              | 0.128                | 0.177                 |                          |
| Conditioning                    |               |              |            |                  |        |                           |              | 0.027                          | 0.111             | 0.089                           | 0.052                         | 0.039              | 0.111                | 0.082                 |                          |
| Max GVHD grades before CR/VGPR  |               |              |            |                  |        |                           |              |                                | 0.146             | 0.301                           | 0.231                         | 0.127              | 0.056                | 0.076                 |                          |
| Timing of CR/VGPR               |               |              |            |                  |        |                           |              |                                |                   | 0.091                           | 0.284                         | 0.005              | 0.055                | 0.104                 |                          |
| Max steroid dose before CR/VGPR |               |              |            |                  |        |                           |              |                                |                   |                                 | 0.176                         | 0.127              | 0.216                | 0.224                 |                          |
| GVHD treatment before CR/VGPR   |               |              |            |                  |        |                           |              |                                |                   |                                 |                               | 0.008              | 0.047                | 0.093                 |                          |
| Treatment response              |               |              |            |                  |        |                           |              |                                |                   |                                 |                               |                    | 0.021                | 0.110                 |                          |

\*Rapid tapers were defined as the weekly steroid decrease rate  $\geq 30\%$  / week if max steroid dose before CR/VGPR  $\geq 1$  mg/kg or  $\geq 20\%$  / week if max steroid dose before CR/VGPR  $< 1$  mg/kg

\*\*Weekly steroid decrease rate were divided into four groups: Group 1 ( $<15\%$ ), Group 2 ( $\geq 15\%$ , and  $<20\%$ ), Group 3 ( $\geq 20\%$ , and  $<30\%$ ), and Group 4 ( $\geq 30\%$ )

**Table S3. Patient characteristics with and without flares**

|                                 |                          | Without flares<br>n = 758 (%) | With flares<br>n = 210 (%) |
|---------------------------------|--------------------------|-------------------------------|----------------------------|
| Median age at HCT, year [range] |                          | 54 [0, 79]                    | 56 [0, 78]                 |
| Recipient Age, category         | <18                      | 83 (10.9)                     | 23 (11.0)                  |
|                                 | 18-54                    | 299 (39.4)                    | 78 (37.1)                  |
|                                 | ≥55                      | 376 (49.6)                    | 109 (51.9)                 |
| Primary disease                 | Acute leukemia           | 420 (55.4)                    | 104 (49.5)                 |
|                                 | MDS/MPN                  | 171 (22.6)                    | 67 (31.9)                  |
|                                 | Lymphoma                 | 69 ( 9.1)                     | 16 ( 7.6)                  |
|                                 | Other                    | 98 (12.9)                     | 23 (11.0)                  |
| Sex Mismatch                    | Female to male           | 112 (14.8)                    | 41 (19.5)                  |
|                                 | Others                   | 646 (85.2)                    | 169 (80.5)                 |
| Donor type                      | HLA matched related      | 137 (18.1)                    | 35 (16.7)                  |
|                                 | HLA matched unrelated    | 428 (56.5)                    | 112 (53.3)                 |
|                                 | HLA mismatched unrelated | 73 ( 9.6)                     | 31 (14.8)                  |
|                                 | Haploidentical           | 93 (12.3)                     | 23 (11.0)                  |
|                                 | Umbilical cord blood     | 27 ( 3.6)                     | 9 ( 4.3)                   |
| GVHD prophylaxis                | CNI based                | 576 (76.0)                    | 162 (77.1)                 |
|                                 | PTCy based               | 150 (19.8)                    | 38 (18.1)                  |
|                                 | Others                   | 32 ( 4.2)                     | 10 ( 4.8)                  |
| HCT-CI                          | 0-2                      | 518 (68.3)                    | 134 (63.8)                 |
|                                 | ≥3                       | 240 (31.7)                    | 76 (36.2)                  |
| Use of ATG or alemtuzumab       | No                       | 438 (57.8)                    | 115 (54.8)                 |
|                                 | Yes                      | 320 (42.2)                    | 95 (45.2)                  |
| Donor source                    | Bone marrow              | 164 (21.6)                    | 38 (18.1)                  |

|                                  |                           |                   |                   |
|----------------------------------|---------------------------|-------------------|-------------------|
|                                  | Peripheral blood          | 567 (74.8)        | 163 (77.6)        |
|                                  | Umbilical cord blood      | 27 ( 3.6)         | 9 ( 4.3)          |
| Conditioning                     | MAC (TBI <8Gy)            | 330 (43.5)        | 91 (43.3)         |
|                                  | MAC (TBI ≥8Gy)            | 129 (17.0)        | 27 (12.9)         |
|                                  | RIC                       | 299 (39.4)        | 92 (43.8)         |
| Median year of HCT [range]       |                           | 2018 [2014, 2021] | 2018 [2014, 2021] |
| Max grades before CR/VGPR        | Grades I-II               | 623 (82.2)        | 165 (78.6)        |
|                                  | Grades III-IV             | 135 (17.8)        | 45 (21.4)         |
| Timing of achievement of CR/VGPR | Late response (>14 days)  | 146 (19.3)        | 26 (12.4)         |
|                                  | Early response (≤14 days) | 612 (80.7)        | 184 (87.6)        |
| Max steroid dose before CR/VGPR  | <1mg/kg                   | 372 (49.1)        | 88 (41.9)         |
|                                  | ≥1mg/kg                   | 386 (50.9)        | 122 (58.1)        |
| GVHD treatment before CR/VGPR    | Steroid alone             | 682 (90.0)        | 182 (86.7)        |
|                                  | Steroid + ruxolitinib     | 18 ( 2.4)         | 4 ( 1.9)          |
|                                  | Steroid + other*          | 58 ( 7.7)         | 24 (11.4)         |
| Treatment response               | CR                        | 536 (70.7)        | 146 (69.5)        |
|                                  | VGPR                      | 222 (29.3)        | 64 (30.5)         |

MDS/MPN, myelodysplastic syndromes/myeloproliferative neoplasms; CNI, calcineurin inhibitor; PTCy, post-transplant cyclophosphamide; ATG, anti-thymocyte globulin; HCT-CI, hematopoietic cell transplantation-specific comorbidity index; MAC, myeloablative conditioning; TBI, total body irradiation; RIC, reduced intensity conditioning.

\*Excludes ruxolitinib

**Table S4. Multivariate analysis for NRM within 6 months after CR/VGPR treating flares as a time-dependent covariate**

|                                  |                           | HR(95% CI)      | <i>P</i> values |
|----------------------------------|---------------------------|-----------------|-----------------|
| Development of flares*           |                           | 4.79(3.15-7.28) | <0.001          |
| Recipient Age, category          | 18-54                     | 1               | Ref             |
|                                  | <18                       | 0.77(0.34-1.74) | 0.534           |
|                                  | ≥55                       | 1.39(0.65-2.99) | 0.402           |
| HCT-CI                           | 0-2                       | 1               | Ref             |
|                                  | ≥3                        | 1.89(1.25-2.86) | 0.003           |
| Max grade before CR/VGPR         | Grades I-II               | 1               | Ref             |
|                                  | Grades III-IV             | 1.32(0.82-2.13) | 0.248           |
| Timing of achievement of CR/VGPR | Late response (>14 days)  | 1               | Ref             |
|                                  | Early response (≤14 days) | 0.63(0.38-1.04) | 0.069           |
| Max steroid dose before CR/VGPR  | <1mg/kg                   | 1               | Ref             |
|                                  | ≥1mg/kg                   | 1.32(0.82-2.13) | 0.248           |
| GVHD treatment before CR/VGPR    | Steroid alone             | 1               | Ref             |
|                                  | Steroid + ruxolitinib     | 1.15(0.35-3.80) | 0.822           |
|                                  | Steroid + other**         | 1.80(1.01-3.22) | 0.047           |
| Treatment response               | CR                        | 1               | Ref             |
|                                  | VGPR                      | 0.76(0.45-1.27) | 0.288           |

\* Time-dependent covariate

\*\*Excludes ruxolitinib

**Table S5. GVHD characteristics at 1st onset and at flare**

|             |     | 1st onset GVHD |                |             |
|-------------|-----|----------------|----------------|-------------|
|             |     | Whole patients | Flare patients | Flare onset |
|             |     | n = 968 (%)    | n = 210 (%)    | n = 210 (%) |
| GVHD grades | I   | 313 (32)       | 74 (35.2)      | 43 (21)     |
|             | II  | 497 (51)       | 98 (46.7)      | 80 (38)     |
|             | III | 132 (14)       | 28 (13.3)      | 58 (28)     |
|             | IV  | 26 ( 3)        | 10 ( 4.8)      | 29 (14)     |
| Skin stage  | 0   | 300 (31)       | 59 (28.1)      | 102 (49)    |
|             | 1   | 173 (18)       | 41 (19.5)      | 30 (14)     |
|             | 2   | 285 (29)       | 67 (31.9)      | 43 (21)     |
|             | 3   | 206 (21)       | 41 (19.5)      | 33 (16)     |
|             | 4   | 4 ( 1)         | 2 ( 1.0)       | 2 ( 1)      |
| LGI stage   | 0   | 662 (68)       | 141 (67.1)     | 94 (45)     |
|             | 1   | 162 (17)       | 33 (15.7)      | 39 (19)     |
|             | 2   | 78 ( 8)        | 20 ( 9.5)      | 32 (15)     |
|             | 3   | 44 ( 5)        | 8 ( 3.8)       | 21 (10)     |
|             | 4   | 22 ( 2)        | 8 ( 3.8)       | 24 (11)     |
| UGI stage   | 0   | 682 (71)       | 150 (71.4)     | 162 (77)    |
|             | 1   | 286 (30)       | 60 (28.6)      | 48 (23)     |
| Liver stage | 0   | 942 (97)       | 205 (97.6)     | 194 (92)    |
|             | 1   | 12 ( 1)        | 3 ( 1.4)       | 7 ( 3)      |
|             | 2   | 11 ( 1)        | 2 ( 1.0)       | 7 ( 3)      |
|             | 3   | 2 ( 1)         | 0 ( 0.0)       | 0 ( 0)      |
|             | 4   | 1 ( 1)         | 0 ( 0.0)       | 2 ( 1)      |



**Table S6. Cumulative incidence of GVHD flares within 6 months from CR/VGPR stratified by baseline characteristics**

|                           |                          | Cumulative incidence<br>(95% CI) | <i>P</i> values |
|---------------------------|--------------------------|----------------------------------|-----------------|
| Recipient Age, category   | <18                      | 21.1% (13.8-29.4)                | 0.823           |
|                           | 18-54                    | 20.5% (16.5-24.8)                |                 |
|                           | ≥55                      | 22.5% (18.9-26.4)                |                 |
| Sex Mismatch              | Female to male           | 20.6% (17.9-23.5)                | 0.100           |
|                           | Others                   | 26.4% (19.6-33.6)                |                 |
| Donor type                | HLA matched related      | 20.0% (14.4-26.4)                | 0.299           |
|                           | HLA matched unrelated    | 20.6% (17.2-24.2)                |                 |
|                           | HLA mismatched unrelated | 29.0% (20.5-37.9)                |                 |
|                           | Haploidentical           | 20.4% (13.5-28.3)                |                 |
|                           | Umbilical cord blood     | 26.6% (13.0-42.3)                |                 |
| GVHD prophylaxis          | CNI based                | 21.6% (18.7-24.7)                | 0.826           |
|                           | PTCy based               | 20.6% (15.1-26.7)                |                 |
|                           | Others                   | 24.3% (12.5-38.3)                |                 |
| HCT-CI                    | 0-2                      | 20.5% (17.5-23.7)                | 0.263           |
|                           | ≥3                       | 23.8% (19.2-28.7)                |                 |
| Use of ATG or alemtuzumab | No                       | 21.0% (17.7-24.6)                | 0.589           |
|                           | Yes                      | 22.3% (18.4-26.5)                |                 |
| Conditioning              | MAC (TBI <8Gy)           | 21.5% (17.7-25.6)                | 0.229           |
|                           | MAC (TBI ≥8Gy)           | 16.9% (11.4-23.2)                |                 |
|                           | RIC                      | 23.6% (19.4-28.0)                |                 |
| Max grade before CR/VGPR  | Grades I-II              | 21.0% (18.2-24.0)                | 0.429           |
|                           | Grades III-IV            | 24.2% (18.0-30.9)                |                 |

|                                  |                                  |                   |       |
|----------------------------------|----------------------------------|-------------------|-------|
| Timing of achievement of CR/VGPR | Late response (>14 days)         | 14.3% (9.5-20.1)  | 0.016 |
|                                  | Early response ( $\leq$ 14 days) | 23.1% (20.2-26.1) |       |
| Max steroid dose before CR/VGPR  | <1mg/kg                          | 19.2% (15.7-22.9) | 0.082 |
|                                  | $\geq$ 1mg/kg                    | 23.8% (20.1-27.6) |       |
| GVHD treatment before CR/VGPR    | Steroid alone                    | 21.1% (18.4-23.9) | 0.344 |
|                                  | Steroid + ruxolitinib            | 15.1% (3.5-34.4)  |       |
|                                  | Steroid + other                  | 28.2% (18.6-38.5) |       |
| Treatment response               | CR                               | 21.3% (18.3-24.5) | 0.833 |
|                                  | VGPR                             | 22.1% (17.4-27.1) |       |

**Table S7. Effect modifications of steroid taper rates by the AA scores on the risk of flares**

|                 | Cumulative incidence<br>at 6 months<br>(95% CI) | <i>P</i> values | Adjusted HR*<br>(95% CI) | <i>P</i> values | Additive<br>interaction<br>HR(95% CI)* | Additive<br>interaction<br><i>P</i> values* |
|-----------------|-------------------------------------------------|-----------------|--------------------------|-----------------|----------------------------------------|---------------------------------------------|
| AA1 (n = 534)   |                                                 |                 |                          |                 |                                        |                                             |
| Slow tapers     | 11.9%(8.7-15.7)                                 | 0.001           | 1                        | Ref             | 1                                      | Ref                                         |
| Rapid tapers    | 22.1%(16.6-28.1)                                |                 | 2.25(1.43-3.55)          | <0.001          | 2.09(0.40-3.78)                        | 0.008                                       |
| AA2/3 (n = 434) |                                                 |                 |                          |                 |                                        |                                             |
| Slow tapers     | 22.3%(17.4-27.5)                                | <0.001          | 1                        | Ref             |                                        |                                             |
| Rapid tapers    | 39.8%(32.1-37.4)                                |                 | 3.24(1.99-5.28)          | <0.001          |                                        |                                             |

\*Adjusted for maximum GVHD grade, treatment, and maximum steroid dose before CR/VGPR, time to CR/VGPR, age, sex mismatch, donor type, GVHD prophylaxis, HCT-CI, use of ATG or alemtuzumab, and conditioning regimen.

**Table S8. Flare rates within 6 months stratified by three risk factors**

|                               | AA1          | AA2/3        |
|-------------------------------|--------------|--------------|
| Late response & Slow tapers   | 2%, n=51     | 21.1%, n=46  |
| Late response & Rapid tapers  | 10.0%, n=41  | 30.3%, n=34  |
| Early response & Slow tapers  | 13.7%, n=280 | 22.5%, n=224 |
| Early response & Rapid tapers | 25.2%, n=162 | 42.4%, n=130 |

**Figure S1. Associations of treatment response on flares and NRM**

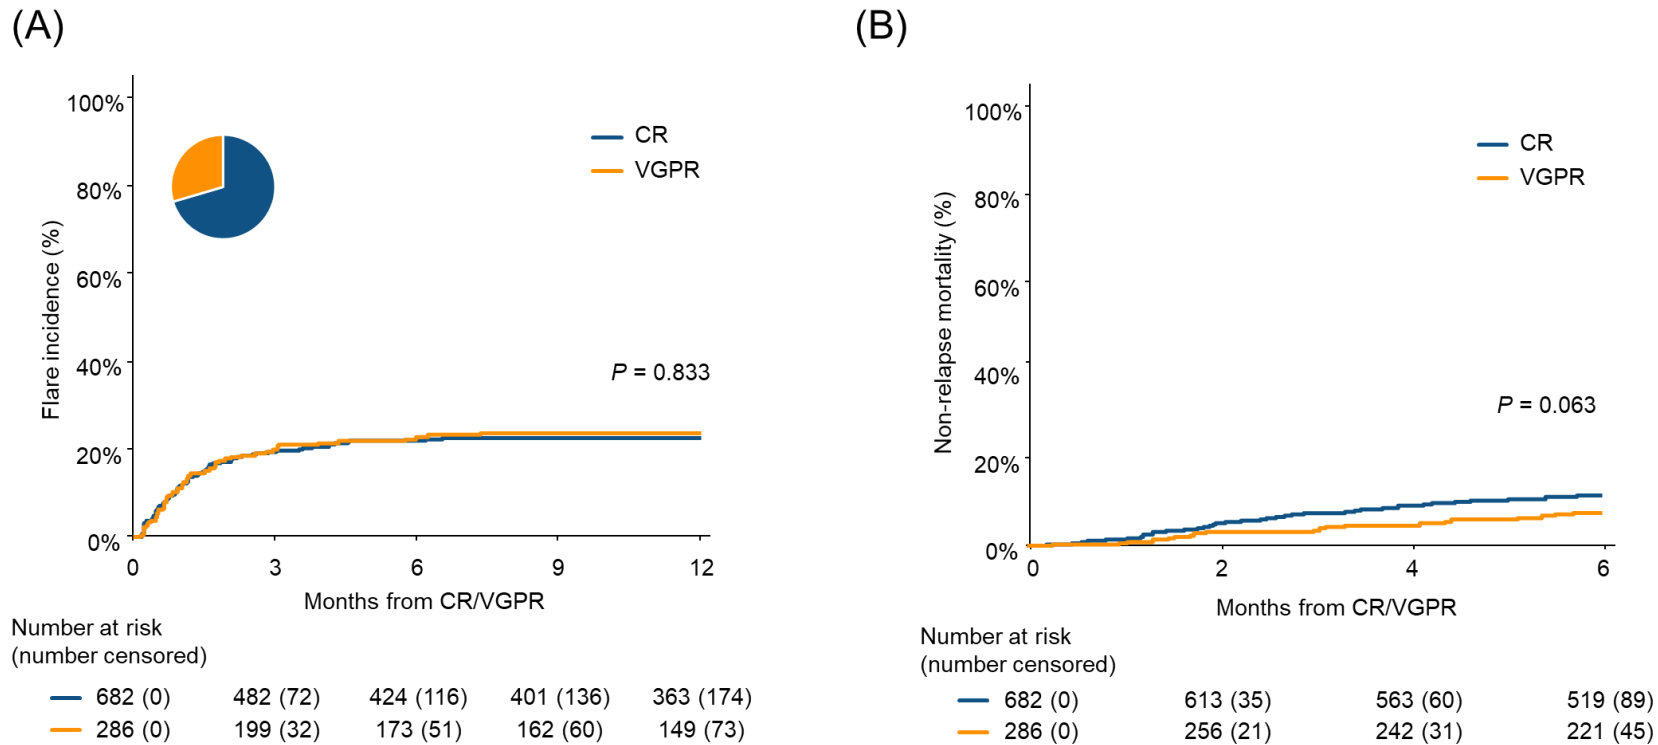

(A) The cumulative incidence of flares after CR/VGPR in patients who achieved CR or VGPR; the cumulative incidence at 6 month was 21.3% (95% CI, 18.3% to 24.5%) in patients with CR and 22.1% (95% CI, 17.4% to 27.1%) in patients with VGPR. The pie chart shows the percentage of patients with CR (blue) and VGPR (yellow). (B) The cumulative incidence of NRM after CR/VGPR in patients who achieved CR or VGPR; the cumulative incidence at 6 month was 11.0% (95% CI, 8.8% to 13.5%) in patients with CR and 7.1% (95% CI, 4.5% to 10.5%) in patients with VGPR. The pie charts represent the percentage of CR (blue) and VGPR (yellow).

**Figure S2. Association of steroid taper rates on flares**

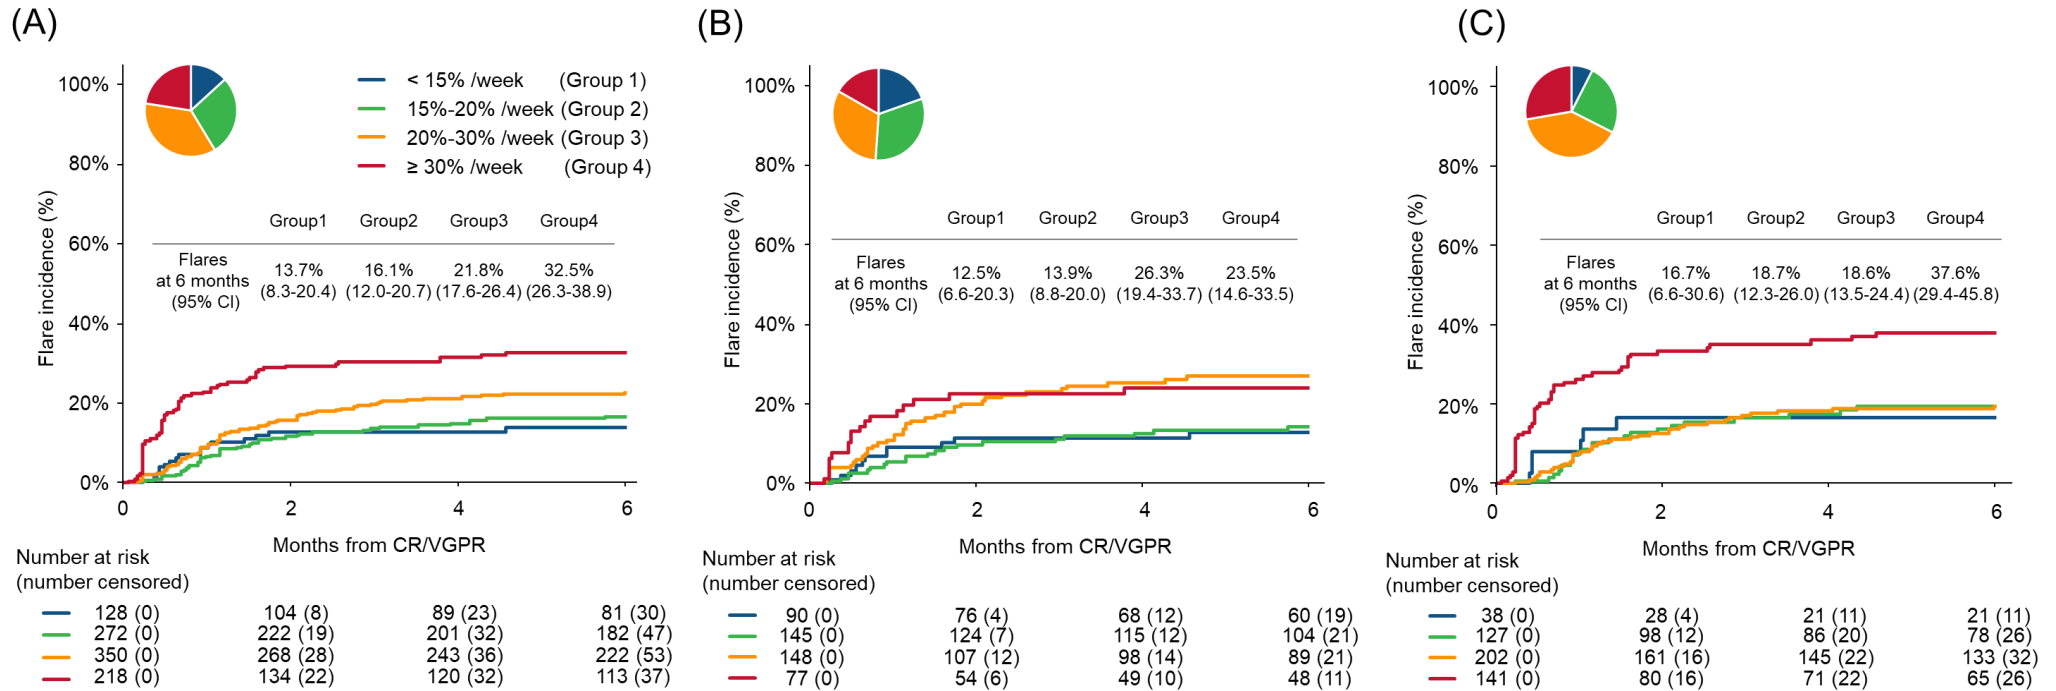

(A) The cumulative incidence of flares stratified by the weekly steroid reduction rate. The weekly steroid reduction rate was divided into four groups: Group 1 (<15%), Group 2 (≥15%, and <20%), Group 3 (≥20%, and <30%), and Group 4 (≥30%). (B) The cumulative incidence of flares stratified by the weekly steroid reduction rate in patients with maximum steroid dose before CR/VGPR <1 mg/kg. (C) The cumulative incidence of flares stratified by the weekly steroid reduction rate in patients with maximum steroid dose before CR/VGPR ≥1 mg/kg. The pie charts represent the percentage of each steroid reduction group.

**Figure S3. Association of biomarkers at the time of flares on NRM**

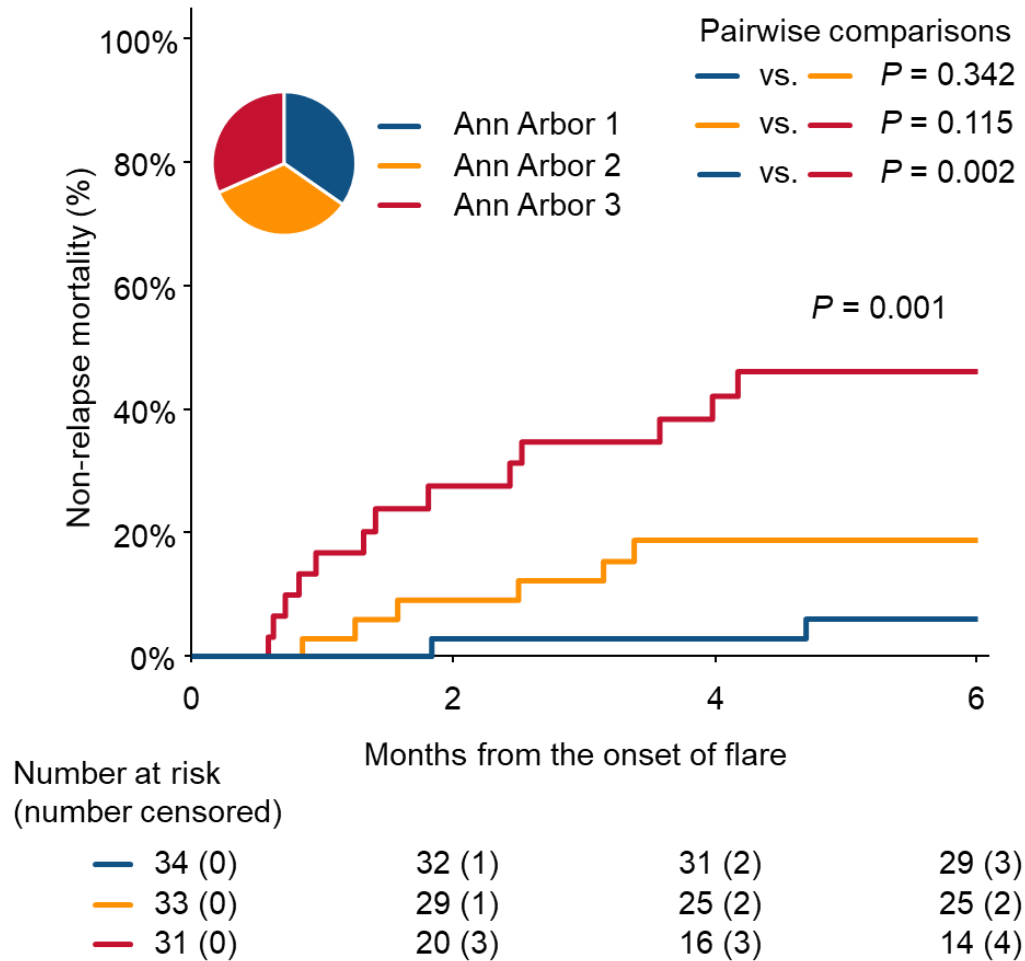

The cumulative incidence of NRM stratified by the AA score at the time of flares; the cumulative incidence at 6 month was 6.0% (95% CI, 1.0% to 17.6%) in AA1, 18.5% (95% CI, 7.4% to 33.6%) in AA2, and 42.2% (95% CI, 24.4% to 59.0%) in AA3. The pie chart shows the percentage of AA1 (blue), AA2 (yellow), and AA3 (red).  $P$  values for pairwise comparisons were adjusted using a Bonferroni method.
